# Supplementary material for: Taxonomic Comparison, Antioxidant and Antibacterial Activities of Three Ebenus pinnata Ait. ecotypes (Fabaceae) from Algeria
Source: MDPI journal article supplement (doi:10.3390/horticulturae9080879), 2023-08-03

**Appendix B** : Detailed PCA results (see Supplementary Materials S1 for raw data matrix).

| Eigenvalues of correlation matrix, and related statistics ( <b>SM1</b> ) Active variables only |            |                    |                         |                |
|------------------------------------------------------------------------------------------------|------------|--------------------|-------------------------|----------------|
|                                                                                                | Eigenvalue | % Total - variance | Cumulative - Eigenvalue | Cumulative - % |
| 1                                                                                              | 15,08888   | 34,29292           | 15,08888                | 34,2929        |
| 2                                                                                              | 6,60508    | 15,01155           | 21,69397                | 49,3045        |
| 3                                                                                              | 4,11255    | 9,34670            | 25,80652                | 58,6512        |
| 4                                                                                              | 2,40975    | 5,47671            | 28,21627                | 64,1279        |
| 5                                                                                              | 1,85590    | 4,21796            | 30,07217                | 68,3458        |
| 6                                                                                              | 1,71467    | 3,89699            | 31,78685                | 72,2428        |
| 7                                                                                              | 1,40754    | 3,19896            | 33,19439                | 75,4418        |
| 8                                                                                              | 1,38228    | 3,14154            | 34,57667                | 78,5833        |
| 9                                                                                              | 0,92204    | 2,09553            | 35,49870                | 80,6789        |
| 10                                                                                             | 0,84331    | 1,91661            | 36,34201                | 82,5955        |

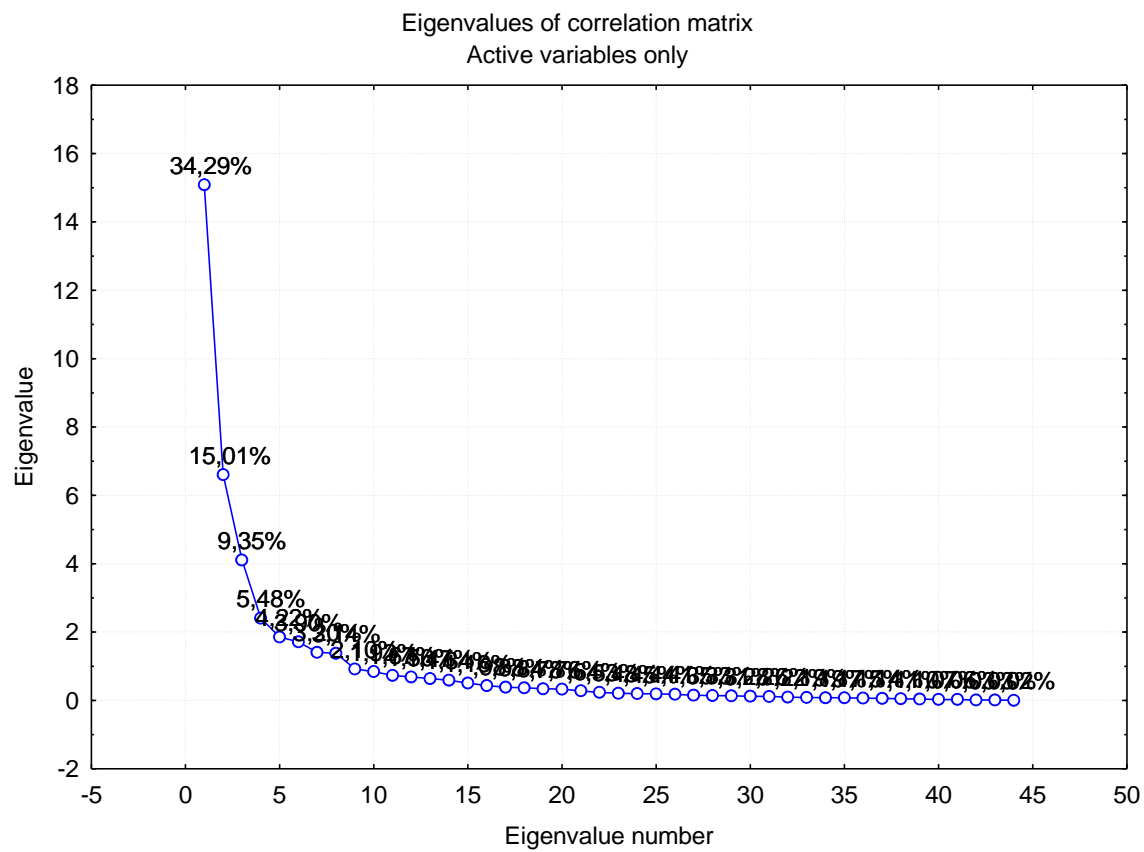

Factor-variable correlations (factor loadings), based on correlations (see Table for character codings).

|             | PC 1  | PC 2  | PC 3  | PC 4  | PC 5  |
|-------------|-------|-------|-------|-------|-------|
| <b>DBP</b>  | 0,49  | -0,24 | -0,51 | 0,32  | 0,00  |
| <b>LLS</b>  | 0,80  | 0,10  | -0,37 | -0,11 | -0,10 |
| <b>NS</b>   | 0,23  | -0,60 | 0,03  | 0,51  | 0,14  |
| <b>DLS</b>  | 0,47  | -0,41 | -0,51 | 0,15  | 0,01  |
| <b>LIN</b>  | 0,67  | 0,16  | -0,32 | -0,05 | -0,06 |
| <b>NI</b>   | 0,52  | -0,39 | -0,13 | 0,31  | 0,05  |
| <b>LS1</b>  | 0,66  | 0,17  | -0,46 | 0,07  | -0,13 |
| <b>WS</b>   | 0,56  | -0,13 | -0,43 | 0,07  | 0,02  |
| <b>LL</b>   | 0,77  | -0,05 | -0,31 | -0,08 | -0,21 |
| <b>WL</b>   | 0,67  | -0,06 | -0,32 | -0,09 | -0,43 |
| <b>LP</b>   | 0,73  | 0,03  | -0,28 | -0,14 | -0,20 |
| <b>NPL</b>  | 0,43  | -0,07 | 0,06  | -0,27 | 0,37  |
| <b>LNLP</b> | -0,18 | -0,29 | -0,20 | 0,58  | -0,10 |
| <b>HNLP</b> | 0,43  | -0,23 | -0,18 | -0,11 | 0,37  |
| <b>LLB</b>  | 0,69  | 0,03  | -0,19 | -0,08 | -0,42 |
| <b>WLB</b>  | 0,22  | -0,63 | -0,24 | 0,22  | -0,30 |
| <b>LIP</b>  | 0,56  | -0,31 | -0,27 | -0,28 | -0,13 |
| <b>HI</b>   | 0,43  | -0,49 | -0,40 | -0,19 | 0,20  |
| <b>DI</b>   | 0,33  | -0,16 | -0,28 | -0,49 | 0,01  |
| <b>LNF</b>  | 0,24  | 0,24  | -0,39 | -0,29 | 0,30  |
| <b>HNF</b>  | 0,66  | -0,41 | -0,22 | -0,30 | 0,14  |
| <b>LFB</b>  | 0,08  | 0,29  | -0,46 | -0,10 | 0,44  |
| <b>WFB</b>  | 0,06  | -0,12 | 0,01  | 0,06  | 0,15  |
| <b>LC1</b>  | -0,05 | 0,25  | -0,50 | 0,31  | 0,25  |
| <b>LC2</b>  | 0,13  | -0,25 | -0,21 | 0,22  | 0,45  |
| <b>TLW</b>  | 0,40  | 0,87  | -0,04 | 0,12  | -0,06 |
| <b>WWB</b>  | 0,45  | 0,85  | -0,02 | 0,13  | -0,05 |
| <b>WBW</b>  | -0,67 | 0,23  | -0,33 | -0,14 | -0,22 |
| <b>WMW</b>  | -0,02 | 0,89  | -0,16 | 0,09  | -0,14 |
| <b>TWK</b>  | -0,86 | -0,34 | -0,24 | -0,15 | -0,10 |
| <b>LWPK</b> | -0,86 | -0,25 | -0,24 | -0,04 | -0,10 |
| <b>TLK</b>  | -0,81 | -0,29 | -0,22 | -0,07 | -0,11 |
| <b>TLS</b>  | -0,89 | -0,02 | -0,31 | -0,17 | 0,01  |
| <b>LSB</b>  | -0,86 | -0,29 | -0,22 | -0,06 | -0,05 |
| <b>WSB</b>  | -0,87 | -0,39 | -0,22 | -0,08 | -0,05 |
| <b>LSP</b>  | -0,31 | 0,38  | -0,18 | -0,57 | 0,21  |
| <b>LCM</b>  | -0,42 | 0,67  | -0,36 | 0,18  | 0,18  |
| <b>LCT</b>  | 0,04  | 0,81  | -0,26 | 0,21  | -0,13 |
| <b>LHCT</b> | -0,15 | 0,22  | -0,31 | 0,39  | 0,29  |
| <b>LPM</b>  | -0,85 | 0,14  | -0,41 | -0,05 | -0,09 |

|            |       |       |       |       |       |
|------------|-------|-------|-------|-------|-------|
| <b>WPM</b> | -0,71 | 0,40  | -0,39 | 0,09  | 0,08  |
| <b>LS2</b> | -0,87 | -0,06 | -0,38 | -0,02 | -0,13 |
| <b>WS</b>  | -0,85 | 0,06  | -0,37 | -0,01 | -0,12 |
| <b>LR</b>  | -0,77 | -0,34 | -0,23 | 0,07  | 0,00  |

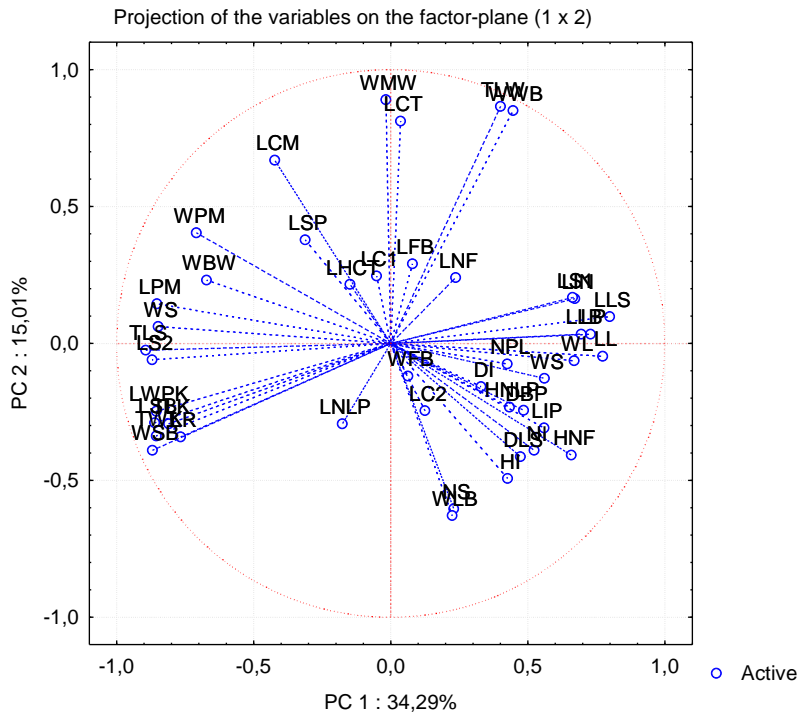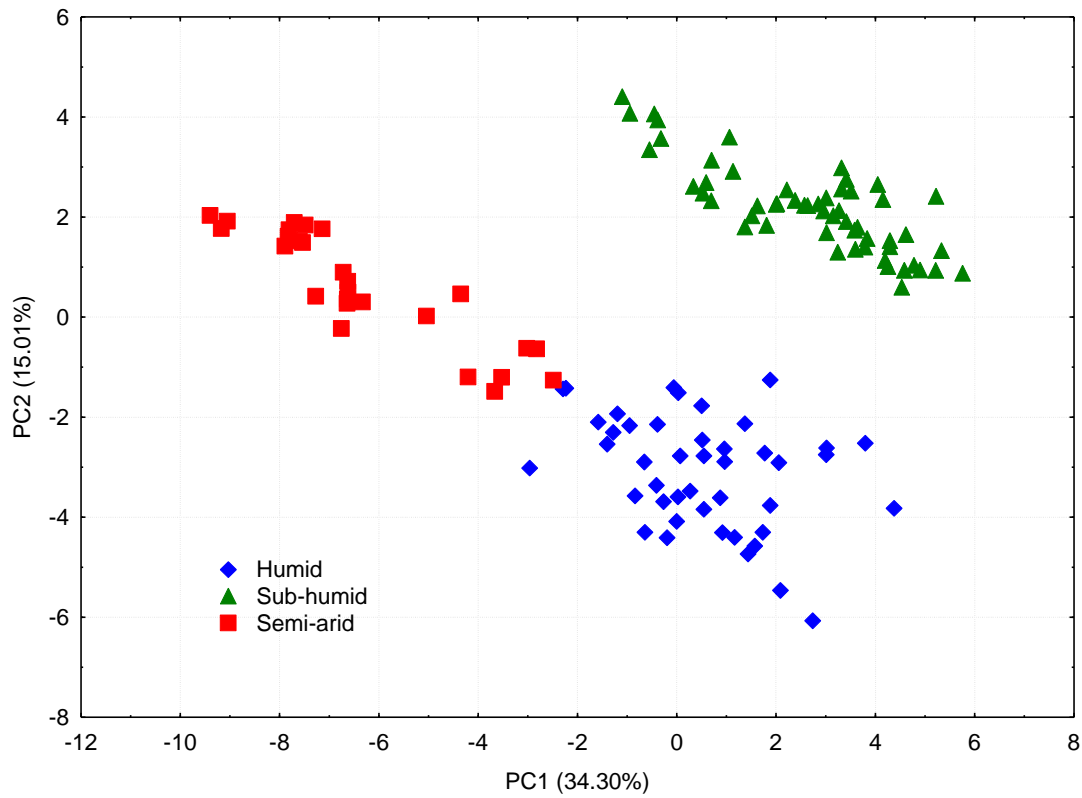

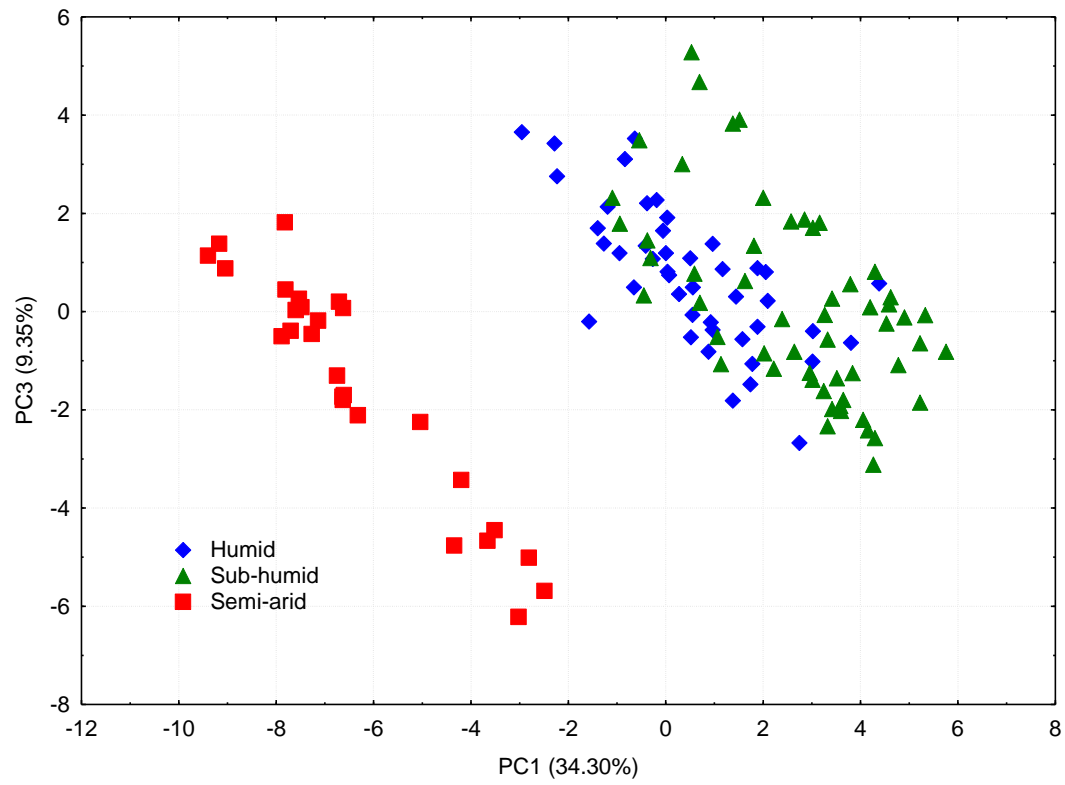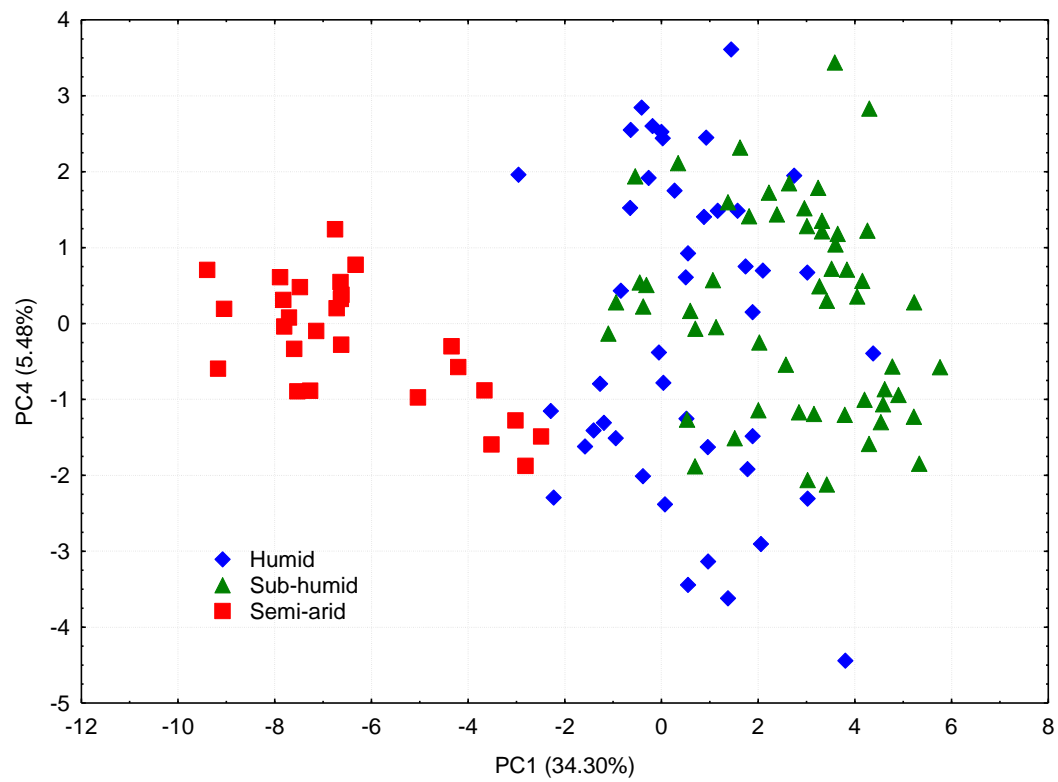

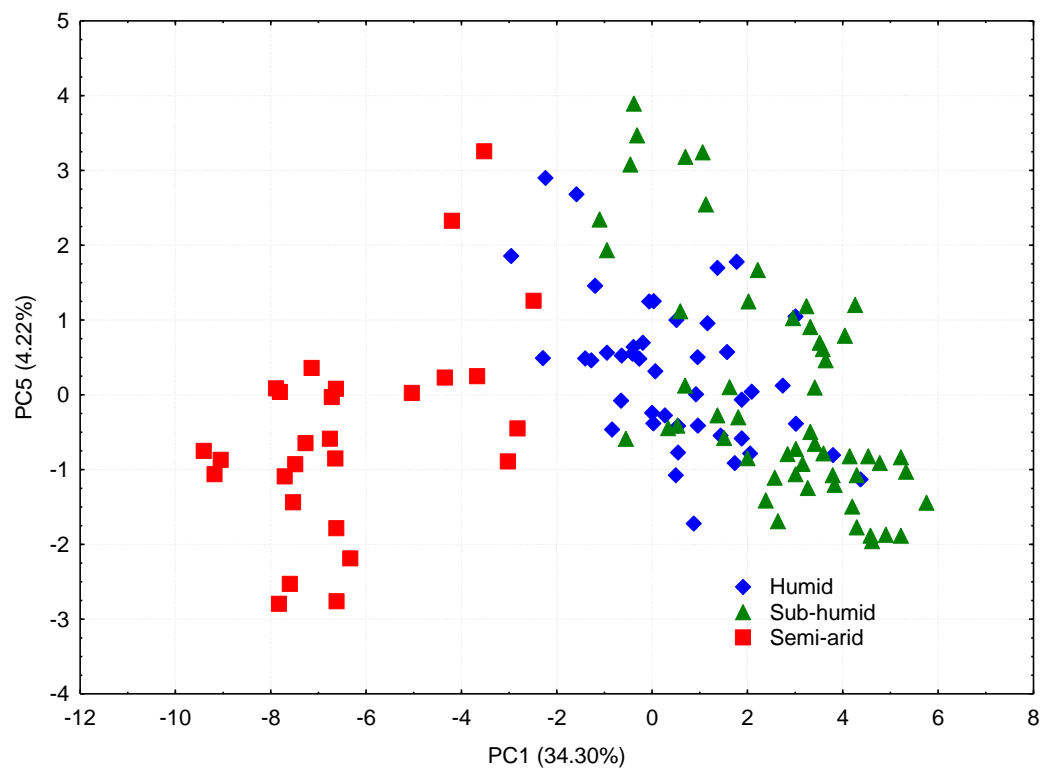

Supplement: s1 [file s1]
