# Supplementary material for: Taxonomic Comparison, Antioxidant and Antibacterial Activities of Three Ebenus pinnata Ait. ecotypes (Fabaceae) from Algeria
Source: MDPI journal article supplement (doi:10.3390/horticulturae9080879), 2023-08-03
Supplement: s1 [file s1]

**Appendix C :** Pollen grains size of *Ebenus pinnata* studied groups and five other *Ebenus* species in relation to their haploid total chromosome lengths (HTCL) ( $\mu\text{m}$ ). P: Polar axis ( $\mu\text{m}$ ); E: Equatorial axis ( $\mu\text{m}$ ). References: Aytaç and Yildirim [2], Ghanavati and Amirabadizadeh [9], Halbritter et al. [12] for pollen grains size; Aytaç et al. [10], Aksoy et al. [14] for HTCL.

| <b>Taxon</b>            | <b>P</b> | <b>E</b> | <b>P/E</b> | <b>PxE</b> | <b>HTCL</b> |
|-------------------------|----------|----------|------------|------------|-------------|
| Humid group             | 17.95    | 12.8     | 1.4        | 229.76     | 23.82       |
| Sub-humid group         | 19.47    | 13.03    | 1.49       | 253.69     | 28.33       |
| Semi-arid group         | 18.43    | 12.84    | 1.44       | 236.64     | 26.98       |
| <i>E. barbigera</i>     | 24.6     | 17.3     | 1.42       | 425.58     | 15.34       |
| <i>E. macrophylla</i>   | 28.3     | 16.8     | 1.68       | 475.44     | 21.93       |
| <i>E. plumosa</i>       | 30.4     | 16.2     | 1.88       | 492.48     | 24.44       |
| <i>E. haussknechtii</i> | 29.1     | 17.7     | 1.64       | 515.07     | 17.9        |
| <i>E. longipes</i>      | 35.6     | 18.4     | 1.93       | 655.04     | 20.2        |
