# Supplementary material for: Taxonomic Comparison, Antioxidant and Antibacterial Activities of Three Ebenus pinnata Ait. ecotypes (Fabaceae) from Algeria
Source: MDPI journal article supplement (doi:10.3390/horticulturae9080879), 2023-08-03
Supplement: s1 [file s1]

**Appendix A: Detailed morphological comparison of *Ebenus pinnata* plants from different climate stages.** Values are expressed as Mean  $\pm$  SD (upper line) and Min-Max (lower line). Explanatory R values of PC1 and PC2 of Figure 1 are shown in bold. See Table 2 for trait full names and measure units. Mean values with different capital letters are statistically different (Unequal N HSD Test,  $\alpha = 0.05$ ), with A<B<C. Lowercase letters a and b compare the polar (P) against the equatorial (E) axis of pollen grains (t-Test for dependent samples,  $\alpha < 0.001$ ); with a<b. See abbreviation full names at the foot of the table<sup>1</sup>.

| No | Trait Code | R1    | R2    | Humid                                    | Sub-humid                                | Semi-arid                               |
|----|------------|-------|-------|------------------------------------------|------------------------------------------|-----------------------------------------|
| 1  | DBP        | 0.45  | -0.25 | 0.73 $\pm$ 0.19 <b>B</b><br>0.31-1.19    | 0.73 $\pm$ 0.33 <b>B</b><br>0.11-1.98    | 0.55 $\pm$ 0.25 <b>A</b><br>0.23-1.4    |
| 2  | LLS        | 0.78  | 0.06  | 68.22 $\pm$ 18.38 <b>B</b><br>34.8-101.2 | 89.28 $\pm$ 28.93 <b>C</b><br>41.7-165.7 | 44.41 $\pm$ 19.79 <b>A</b><br>19.5-80.5 |
| 3  | NS         | 0.20  | -0.60 | 9.55 $\pm$ 6.52 <b>B</b><br>2-27         | 4.65 $\pm$ 2.47 <b>A</b><br>1-10         | 3.11 $\pm$ 2.41 <b>A</b><br>1-11        |
| 4  | DLS        | 0.43  | -0.42 | 4.19 $\pm$ 1.12 <b>B</b><br>2.1-7.2      | 3.75 $\pm$ 1.01 <b>AB</b><br>0.9-6.1     | 3.16 $\pm$ 1.11 <b>A</b><br>1.9-5.6     |
| 5  | LIN        | 0.66  | 0.12  | 5.27 $\pm$ 1.04 <b>B</b><br>3.4-7.3      | 6.53 $\pm$ 1.57 <b>C</b><br>3.5-9.9      | 4.36 $\pm$ 1.58 <b>A</b><br>1.7-7.4     |
| 6  | NI         | 0.50  | -0.40 | 57.57 $\pm$ 28.25 <b>B</b><br>23-123     | 47.89 $\pm$ 32.23 <b>B</b><br>9-165      | 17.89 $\pm$ 23.80 <b>A</b><br>2-98      |
| 7  | LS1        | 0.65  | 0.14  | 10.98 $\pm$ 1.67 <b>A</b><br>6.5-15.2    | 13.60 $\pm$ 2.74 <b>B</b><br>7.2-19.3    | 10.10 $\pm$ 2.71 <b>A</b><br>6-17.1     |
| 8  | WS         | 0.54  | -0.16 | 4.22 $\pm$ 0.75 <b>B</b><br>2.9-6.5      | 4.41 $\pm$ 0.74 <b>B</b><br>2.9-6.8      | 3.64 $\pm$ 1.00 <b>A</b><br>2.1-5.7     |
| 9  | LL         | 0.75  | -0.08 | 10.01 $\pm$ 2.06 <b>B</b><br>6.3-16.2    | 10.85 $\pm$ 2.60 <b>B</b><br>5.3-17.2    | 6.91 $\pm$ 1.93 <b>A</b><br>3.7-12.5    |
| 10 | WL         | 0.64  | -0.09 | 5.19 $\pm$ 0.80 <b>B</b><br>3.6-6.5      | 5.55 $\pm$ 0.88 <b>B</b><br>3.7-7.4      | 4.64 $\pm$ 0.66 <b>A</b><br>3.3-6.1     |
| 11 | LP         | 0.71  | 0.00  | 4.56 $\pm$ 1.21 <b>B</b><br>1.8-7.5      | 5.23 $\pm$ 1.61 <b>B</b><br>2.4-9.4      | 2.96 $\pm$ 0.98 <b>A</b><br>1.6-5.3     |
| 12 | NPL        | 0.42  | -0.13 | 4.73 $\pm$ 0.50 <b>B</b><br>3-5          | 4.78 $\pm$ 0.50 <b>B</b><br>3-6          | 4.11 $\pm$ 0.97 <b>A</b><br>3-6         |
| 13 | LNLP       | -0.20 | -0.26 | 2.80 $\pm$ 0.55 <b>B</b><br>2-4          | 2.45 $\pm$ 0.50 <b>A</b><br>2-3          | 2.81 $\pm$ 0.68 <b>B</b><br>2-4         |
| 14 | HNLP       | 0.42  | -0.27 | 4.98 $\pm$ 0.15 <b>B</b><br>4-5          | 4.91 $\pm$ 0.35 <b>B</b><br>4-6          | 4.52 $\pm$ 0.89 <b>A</b><br>3-6         |
| 15 | LLB        | 0.67  | -0.00 | 2.45 $\pm$ 0.33 <b>B</b><br>1.6-3.1      | 2.66 $\pm$ 0.35 <b>C</b><br>2-3.2        | 2.15 $\pm$ 0.36 <b>A</b><br>1.5-3.2     |
| 16 | WLB        | 0.18  | -0.60 | 7.77 $\pm$ 1.51 <b>B</b><br>4.8-11.5     | 6.14 $\pm$ 1.21 <b>A</b><br>4.1-8.8      | 6.18 $\pm$ 1.46 <b>A</b><br>3.4-9.3     |
| 17 | LIP        | 0.53  | -0.33 | 22.00 $\pm$ 3.17 <b>B</b><br>16.9-30.9   | 21.29 $\pm$ 3.56 <b>B</b><br>14.2-29.1   | 18.20 $\pm$ 3.94 <b>A</b><br>12.2-27.2  |
| 18 | HI         | 0.38  | -0.50 | 5.21 $\pm$ 1.41 <b>B</b><br>2.8-8.6      | 4.40 $\pm$ 0.75 <b>A</b><br>2.7-5.8      | 3.88 $\pm$ 1.61 <b>A</b><br>1.6-8       |
| 19 | DI         | 0.30  | -0.18 | 2.44 $\pm$ 0.31 <b>A</b><br>3.2-1.9      | 2.40 $\pm$ 0.25 <b>A</b><br>2.8-1.7      | 2.30 $\pm$ 0.31 <b>A</b><br>1.7-3       |
| 20 | LNF        | 0.08  | 0.31  | 11.84 $\pm$ 8.05 <b>A</b><br>2-47        | 16.64 $\pm$ 7.17 <b>B</b><br>3-34        | 13.56 $\pm$ 9.89 <b>AB</b><br>2-35      |
| 21 | HNF        | 0.06  | -0.11 | 56.43 $\pm$ 11.83 <b>C</b><br>29-75      | 49.44 $\pm$ 9.47 <b>B</b><br>22-67       | 33.93 $\pm$ 17.42 <b>A</b><br>14-70     |
| 22 | LFB        | -0.06 | 0.30  | 8.15 $\pm$ 0.62 <b>A</b><br>7-9.5        | 8.60 $\pm$ 0.89 <b>B</b><br>7.1-10.1     | 8.46 $\pm$ 1.04 <b>AB</b><br>5.5-10     |
| 23 | WFB        | 0.11  | -0.26 | 3.29 $\pm$ 0.32 <b>A</b><br>2.5-4.1      | 3.25 $\pm$ 0.18 <b>A</b><br>2.9-3.9      | 3.19 $\pm$ 0.43 <b>A</b><br>2.3-4       |

|    |      |       |       |                                        |                                        |                                        |
|----|------|-------|-------|----------------------------------------|----------------------------------------|----------------------------------------|
| 24 | LC1  | 0.45  | 0.84  | 12.72±0.94 <b>A</b><br>10.5-14.5       | 13.21±0.90 <b>B</b><br>11.5-14.8       | 13.38±1.06 <b>B</b><br>10.5-16         |
| 25 | LC2  | 0.49  | 0.83  | 8.21±0.44 <b>A</b><br>7-9.2            | 8.05±0.24 <b>A</b><br>7.4-8.5          | 7.98±0.70 <b>A</b><br>7-9.2            |
| 26 | TLW  | -0.68 | 0.26  | 1.79±0.08 <b>A</b><br>1.7-1.9          | 3.54±0.13 <b>C</b><br>3.3-3.7          | 2.40±0.07 <b>B</b><br>2.3-2.5          |
| 27 | WWB  | 0.02  | 0.89  | 1.37±0.09 <b>A</b><br>1.2-1.5          | 2.45±0.07 <b>C</b><br>1-1.3            | 1.67±0.05 <b>B</b><br>1.6-1.7          |
| 28 | WBW  | 0.22  | 0.21  | 1.10±0.10 <b>A</b><br>1-1.3            | 1.14±0.06 <b>A</b><br>2.3-2.6          | 1.39±0.04 <b>B</b><br>1.3-1.4          |
| 29 | WMW  | 0.62  | -0.45 | 0.43±0.05 <b>A</b><br>0.4-0.5          | 0.89±0.07 <b>C</b><br>0.7-1            | 0.83±0.07 <b>B</b><br>0.7-0.9          |
| 30 | TWK  | -0.90 | -0.01 | 4.21±0.23 <b>B</b><br>3.7-4.6          | 3.62±0.10 <b>A</b><br>3.5-3.8          | 4.99±0.09 <b>C</b><br>4.8-5.1          |
| 31 | LWPK | -0.86 | 0.11  | 3.47±0.26 <b>B</b><br>2.8-3.9          | 3.12±0.08 <b>A</b><br>3-3.3            | 4.14±0.08 <b>C</b><br>4-4.3            |
| 32 | TLK  | -0.79 | -0.30 | 6.36±0.36 <b>B</b><br>5.7-6.9          | 5.94±0.11 <b>A</b><br>5.7-6.1          | 6.99±0.08 <b>C</b><br>6.9-7.1          |
| 33 | TLS  | -0.40 | 0.70  | 6.65±0.45 <b>B</b><br>5.3-7.5          | 6.30±0.23 <b>A</b><br>6-6.8            | 8.04±0.08 <b>C</b><br>7.9-8.2          |
| 34 | LSB  | 0.08  | 0.83  | 5.13±0.47 <b>B</b><br>3.8-5.6          | 4.49±0.12 <b>A</b><br>4.4-4.9          | 6.06±0.05 <b>C</b><br>6-6.1            |
| 35 | WSB  | -0.86 | 0.19  | 4.67±0.36 <b>B</b><br>3.8-5.1          | 3.36±0.16 <b>A</b><br>3.2-3.7          | 6.04±0.10 <b>C</b><br>5.9-6.2          |
| 36 | LSP  | -0.70 | 0.45  | 1.72±0.47 <b>A</b><br>0.7-2.7          | 1.81±0.16 <b>A</b><br>1.6-2.2          | 2.02±0.10 <b>B</b><br>1.8-2.2          |
| 37 | LCM  | -0.14 | 0.24  | 13.19±0.48 <b>A</b><br>11.9-14         | 14.50±0.89 <b>B</b><br>13.1-16.1       | 15.26±0.18 <b>C</b><br>15-15.7         |
| 38 | LCT  | -0.88 | -0.29 | 2.80±0.14 <b>A</b><br>2.5-3.1          | 3.29±0.12 <b>C</b><br>3.1-3.5          | 3.19±0.12 <b>B</b><br>3-3.3            |
| 39 | LHCT | -0.88 | -0.20 | 3.27±0.05 <b>A</b><br>3.2-3.3          | 3.28±0.07 <b>A</b><br>3.2-3.4          | 3.29±0.03 <b>A</b><br>3.2-3.3          |
| 40 | LPM  | -0.83 | -0.25 | 5.09±0.09 <b>A</b><br>4.9-5.3          | 5.08±0.11 <b>A</b><br>4.9-5.3          | 5.99±0.10 <b>B</b><br>5.8-6.1          |
| 41 | WPM  | -0.91 | 0.02  | 3.04±0.10 <b>A</b><br>2.8-3.3          | 3.15±0.13 <b>B</b><br>2.9-3.4          | 3.46±0.07 <b>C</b><br>3.3-3.5          |
| 42 | LS2  | -0.88 | -0.24 | 2.35±0.07 <b>B</b><br>2.2-2.5          | 2.19±0.10 <b>A</b><br>2.1-2.4          | 3.00±0.08 <b>C</b><br>2.9-3.1          |
| 43 | WS   | -0.90 | -0.34 | 2.05±0.05 <b>A</b><br>2-2.1            | 2.02±0.05 <b>A</b><br>1.9-2.1          | 2.34±0.05 <b>B</b><br>2.3-2.4          |
| 44 | LR   | -0.30 | 0.38  | 2.14±0.05 <b>B</b><br>2.1-2.2          | 2.02±0.07 <b>A</b><br>1.9-2.1          | 2.25±0.05 <b>C</b><br>2.2-2.3          |
| 49 | P    | NA    | NA    | 17.95±1.10 <b>Ab</b><br>15.18-20.39    | 19.47±1.27 <b>Bb</b><br>16.00-23.26    | 18.43±1.08 <b>Ab</b><br>16.27-20.35    |
| 50 | E    | NA    | NA    | 12.80±1.18 <b>Aa</b><br>10.25-14.90    | 13.03±0.99 <b>Aa</b><br>11.27-15.51    | 12.84±1.37 <b>Aa</b><br>10.40-15.46    |
| 51 | P/E  | NA    | NA    | 1.41±0.10 <b>A</b><br>1.19-1.69        | 1.50±0.11 <b>B</b><br>1.28-1.79        | 1.45±0.15 <b>AB</b><br>1.13-1.77       |
| 52 | PxE  | NA    | NA    | 230.56±31.60 <b>A</b><br>167.25-295.02 | 254.31±30.81 <b>B</b><br>182.24-322.85 | 237.16±32.74 <b>A</b><br>175.70-305.05 |
| 53 | PF   | NA    | NA    | 94.04±2.64 <b>A</b><br>89.64-98.71     | 95.01±2.02 <b>A</b><br>89.01-98.07     | 94.97±2.11 <b>A</b><br>91.97-97.85     |

<sup>1</sup> SD: Standard deviation; PC1 and PC2: Principal Components (axes) 1 and 2; R1 and R2: Pearson's coefficient of correlation with PC1 and PC2, respectively; NA: Not attributed. See Table 2 for trait code full names and measure units.
